# Supplementary material for: Modulation of Human Macrophage Responses to Mycobacterium tuberculosis by Silver Nanoparticles of Different Size and Surface Modification
Source: PLoS One. 2015 Nov 18;10(11):e0143077. doi: 10.1371/journal.pone.0143077 (PMC4651328; doi:10.1371/journal.pone.0143077)
Supplement: S7 Data — (XLS) [file pone.0143077.s009.xls]

## Sheet: Exp1 and 2
Exp1	NP	CFU	CFU	CFU	Exp2	NP	CFU	CFU	CFU
Ag20-cit	10 µg/mL	70	72	57	Ag20-cit	10 µg/mL	49	34	45
	25 µg/mL	26	31	22		25 µg/mL	46	42	62
Ag20-PVP	10 µg/mL	71	58	45	Ag20-PVP	10 µg/mL	81	89	88
	25 µg/mL	43	40	40		25 µg/mL	43	41	40
Ag110-cit	10 µg/mL	77	73	72	Ag110-cit	10 µg/mL	54	46	49
	25 µg/mL	26	26	22		25 µg/mL	55	42	44
Ag110-PVP	10 µg/mL	37	44	35	Ag110-PVP	10 µg/mL	84	65	91
	25 µg/mL	80	67	83		25 µg/mL	57	61	75
unexposed	0 µg/mL	63	77		unexposed	0 µg/mL	78	80	52
						0 µg/mL	100	90	97
					AgNO3	10 µg/mL	1	1	2
						25 µg/mL	1	2	1
	NP	average	stdev		Average				Stdev
Ag20-cit	10 µg/mL	54.5	14.7885		NP	0	10	25	0	10	25
	25 µg/mL	38.1667	14.8649		Ag20-cit	79.625	54.5	38.1667	16.3614	14.7885	14.8649
Ag20-PVP	10 µg/mL	72	17.6182		Ag20-PVP	79.625	72	41.1667	16.3614	17.6182	1.47196
	25 µg/mL	41.1667	1.47196		Ag110-cit	79.625	61.8333	35.8333	16.3614	13.6736	13.0907
Ag110-cit	10 µg/mL	61.8333	13.6736		Ag110-PVP	79.625	59.3333	70.5	16.3614	24.3694	10.5024
	25 µg/mL	35.8333	13.0907		AgNO3	79.625	1.33333	1.33333	16.3614	0.57735	0.57735
Ag110-PVP	10 µg/mL	59.3333	24.3694
	25 µg/mL	70.5	10.5024
AgNO3	10 µg/mL	1.33333	0.57735
	25 µg/mL	1.33333	0.57735
unexposed	0 µg/mL	79.625	16.3614
